# Supplementary material for: Acute fatigue affects reaction times and reaction consistency in Mixed Martial Arts fighters
Source: PubMed Central journal article supplement (PMC6994193; doi:10.1371/journal.pone.0227675), 2020-01-31
Supplement: pone.0227675.s003.pdf [file pone.0227675.s003.pdf]

## Mixed Model

### Model Info

| Info                  |                                                             |
|-----------------------|-------------------------------------------------------------|
| Estimate              | Linear mixed model fit by REML                              |
| Call                  | RT ~ 1 + Condition + Trial + FI + Condition: Trial+( 1 ID ) |
| AIC                   | 22125.943                                                   |
| R-squared Marginal    | 0.004                                                       |
| R-squared Conditional | 0.482                                                       |

## Model Results

### Fixed Effect Omnibus tests

|                   | F     | Num df | Den df   | p     |
|-------------------|-------|--------|----------|-------|
| Condition         | 5.452 | 1      | 2102.015 | 0.020 |
| Trial             | 5.588 | 1      | 2102.014 | 0.018 |
| FI                | 0.149 | 1      | 43.003   | 0.701 |
| Condition * Trial | 0.053 | 1      | 2102.015 | 0.818 |

Note. Satterthwaite method for degrees of freedom

### Fixed Effects Parameter Estimates

| Names              | Effect                         | Estimate | SE    | 95% Confidence Interval |         | df       | t      | p      |
|--------------------|--------------------------------|----------|-------|-------------------------|---------|----------|--------|--------|
|                    |                                |          |       | Lower                   | Upper   |          |        |        |
| (Intercept)        | (Intercept)                    | 266.154  | 5.861 | 254.666                 | 277.641 | 44.930   | 45.410 | < .001 |
| Condition1         | 2 - After - 1 - Before         | 4.031    | 1.726 | 0.647                   | 7.414   | 2102.015 | 2.335  | 0.020  |
| Trial              | Trial                          | -0.324   | 0.176 | -0.669                  | 0.022   | 2102.009 | -1.837 | 0.066  |
| FI                 | FI                             | -0.261   | 0.675 | -1.585                  | 1.063   | 43.003   | -0.386 | 0.701  |
| Condition1 * Trial | 2 - After - 1 - Before * Trial | 0.058    | 0.249 | -0.431                  | 0.546   | 2102.015 | 0.231  | 0.818  |

### Random Components

| Groups | Name        | SD     | Variance | ICC   |
|--------|-------------|--------|----------|-------|
| ID     | (Intercept) | 38.456 | 1478.841 | 0.480 |
|        | Residual    | 40.018 | 1601.475 |       |

Note. Numer of Obs: 2150 , groups: ID , 45

## Post Hoc Tests

Post Hoc Comparisons - Condition

| Comparison |             |            |       |        |          |             |
|------------|-------------|------------|-------|--------|----------|-------------|
| Condition  | Condition   | Difference | SE    | test   | df       | Pbonferroni |
| 1 - Before | - 2 - After | -4.031     | 1.726 | -2.335 | 2102.012 | 0.020       |

### Estimated Marginal Means

Condition

| Condition  | Mean    | SE    | df     | 95% Confidence Interval |         |
|------------|---------|-------|--------|-------------------------|---------|
|            |         |       |        | Lower                   | Upper   |
| 1 - Before | 266.154 | 5.861 | 44.930 | 254.348                 | 277.959 |
| 2 - After  | 270.184 | 5.861 | 44.930 | 258.379                 | 281.990 |

Note. Estimated means are estimated averaging across interacting variables

Trial

| Trial     | Mean    | SE    | df     | 95% Confidence Interval |         |
|-----------|---------|-------|--------|-------------------------|---------|
|           |         |       |        | Lower                   | Upper   |
| Mean-1·SD | 270.210 | 5.861 | 44.931 | 258.404                 | 282.015 |
| Mean      | 268.169 | 5.797 | 43.003 | 256.478                 | 279.860 |
| Mean+1·SD | 266.128 | 5.861 | 44.931 | 254.323                 | 277.934 |

Note. Estimated means are estimated averaging across interacting variables

FI

| FI        | Mean    | SE    | df     | 95% Confidence Interval |         |
|-----------|---------|-------|--------|-------------------------|---------|
|           |         |       |        | Lower                   | Upper   |
| Mean-1·SD | 270.408 | 8.198 | 43.004 | 253.875                 | 286.941 |
| Mean      | 268.169 | 5.797 | 43.003 | 256.478                 | 279.860 |
| Mean+1·SD | 265.930 | 8.200 | 43.003 | 249.393                 | 282.468 |

Note. Estimated means are estimated keeping constant other independent variable(s) in the model to the mean

Condition:Trial

| Condition  | Trial     | Mean    | SE    | df     | 95% Confidence Interval |         |
|------------|-----------|---------|-------|--------|-------------------------|---------|
|            |           |         |       |        | Lower                   | Upper   |
| 1 - Before | Mean-1·SD | 268.394 | 5.987 | 48.912 | 256.362                 | 280.425 |
| 2 - After  | Mean-1·SD | 272.026 | 5.987 | 48.908 | 259.994                 | 284.058 |
| 1 - Before | Mean      | 266.154 | 5.861 | 44.930 | 254.348                 | 277.959 |
| 2 - After  | Mean      | 270.184 | 5.861 | 44.930 | 258.379                 | 281.990 |
| 1 - Before | Mean+1·SD | 263.914 | 5.986 | 48.890 | 251.883                 | 275.945 |
| 2 - After  | Mean+1·SD | 268.343 | 5.988 | 48.930 | 256.310                 | 280.376 |

Note. Estimated means are estimated keeping constant other independent variable(s) in the model to the mean

## Fixed Effects Plots

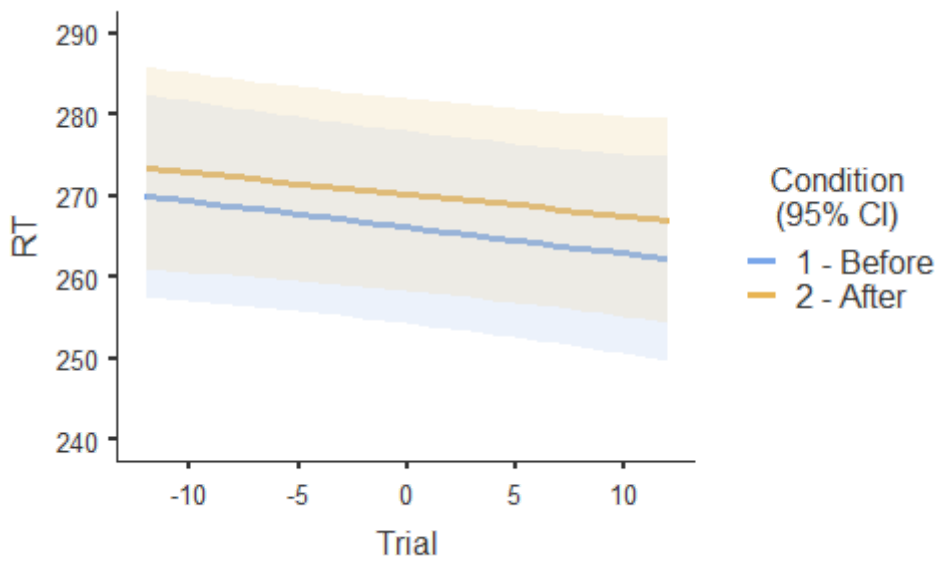

## Mixed Model

Model Info

| Info                  |                                                            |
|-----------------------|------------------------------------------------------------|
| Estimate              | Linear mixed model fit by REML                             |
| Call                  | MT ~ 1 + Condition + Trial + FI + Condition:Trial+( 1 ID ) |
| AIC                   | 25871.410                                                  |
| R-squared Marginal    | 0.003                                                      |
| R-squared Conditional | 0.035                                                      |

## Model Results

Fixed Effect Omnibus tests

|                   | F     | Num df | Den df   | p     |
|-------------------|-------|--------|----------|-------|
| Condition         | 0.559 | 1      | 2102.256 | 0.455 |
| Trial             | 5.173 | 1      | 2102.238 | 0.023 |
| FI                | 0.278 | 1      | 43.050   | 0.601 |
| Condition * Trial | 0.263 | 1      | 2102.246 | 0.608 |

Note. Satterthwaite method for degrees of freedom

Fixed Effects Parameter Estimates

| Names              | Effect                         | Estimate | SE    | 95% Confidence Interval |         | df       | t      | p      |
|--------------------|--------------------------------|----------|-------|-------------------------|---------|----------|--------|--------|
|                    |                                |          |       | Lower                   | Upper   |          |        |        |
| (Intercept)        | (Intercept)                    | 115.008  | 4.020 | 107.129                 | 122.888 | 82.729   | 28.606 | < .001 |
| Condition1         | 2 - After - 1 - Before         | -3.180   | 4.253 | -11.517                 | 5.156   | 2102.256 | -0.748 | 0.455  |
| Trial              | Trial                          | -0.541   | 0.434 | -1.392                  | 0.310   | 2102.145 | -1.247 | 0.213  |
| FI                 | FI                             | 0.210    | 0.398 | -0.570                  | 0.989   | 43.050   | 0.527  | 0.601  |
| Condition1 * Trial | 2 - After - 1 - Before * Trial | -0.315   | 0.615 | -1.520                  | 0.890   | 2102.246 | -0.513 | 0.608  |

Random Components

| Groups   | Name        | SD     | Variance | ICC   |
|----------|-------------|--------|----------|-------|
| ID       | (Intercept) | 17.897 | 320.319  | 0.032 |
| Residual |             | 98.604 | 9722.789 |       |

Note. Numer of Obs: 2150 , groups: ID , 45

## Post Hoc Tests

Post Hoc Comparisons - Condition

| Comparison |             | Difference | SE    | test  | df       | Pbonferroni |
|------------|-------------|------------|-------|-------|----------|-------------|
| Condition  | Condition   |            |       |       |          |             |
| 1 - Before | - 2 - After | 3.180      | 4.253 | 0.748 | 2102.210 | 0.455       |

## Estimated Marginal Means

Condition

| Condition  | Mean    | SE    | df     | 95% Confidence Interval |         |
|------------|---------|-------|--------|-------------------------|---------|
|            |         |       |        | Lower                   | Upper   |
| 1 - Before | 115.008 | 4.020 | 82.729 | 107.012                 | 123.005 |
| 2 - After  | 111.828 | 4.020 | 82.729 | 103.831                 | 119.825 |

Note. Estimated means are estimated averaging across interacting variables

Trial

| Trial     | Mean    | SE    | df     | 95% Confidence Interval |         |
|-----------|---------|-------|--------|-------------------------|---------|
|           |         |       |        | Lower                   | Upper   |
| Mean-1-SD | 118.256 | 4.021 | 82.750 | 110.259                 | 126.253 |
| Mean      | 113.418 | 3.412 | 43.045 | 106.538                 | 120.299 |
| Mean+1-SD | 108.580 | 4.021 | 82.751 | 100.583                 | 116.578 |

Note. Estimated means are estimated averaging across interacting variables

FI

| FI        | Mean    | SE    | df     | 95% Confidence Interval |         |
|-----------|---------|-------|--------|-------------------------|---------|
|           |         |       |        | Lower                   | Upper   |
| Mean-1-SD | 111.619 | 4.825 | 43.057 | 101.888                 | 121.349 |
| Mean      | 113.418 | 3.412 | 43.045 | 106.538                 | 120.299 |
| Mean+1-SD | 115.218 | 4.826 | 43.038 | 105.486                 | 124.950 |

Note. Estimated means are estimated keeping constant other independent variable(s) in the model to the mean

Condition:Trial

| Condition  | Trial     | Mean    | SE    | df      | 95% Confidence Interval |         |
|------------|-----------|---------|-------|---------|-------------------------|---------|
|            |           |         |       |         | Lower                   | Upper   |
| 1 - Before | Mean-1-SD | 118.756 | 5.022 | 196.479 | 108.852                 | 128.659 |
| 2 - After  | Mean-1-SD | 117.757 | 5.021 | 196.381 | 107.855                 | 127.658 |
| 1 - Before | Mean      | 115.008 | 4.020 | 82.729  | 107.012                 | 123.005 |
| 2 - After  | Mean      | 111.828 | 4.020 | 82.729  | 103.831                 | 119.825 |
| 1 - Before | Mean+1-SD | 111.261 | 5.017 | 195.799 | 101.367                 | 121.155 |
| 2 - After  | Mean+1-SD | 105.900 | 5.026 | 197.064 | 95.989                  | 115.810 |

Note. Estimated means are estimated keeping constant other independent variable(s) in the model to the mean

**Fixed Effects Plots**

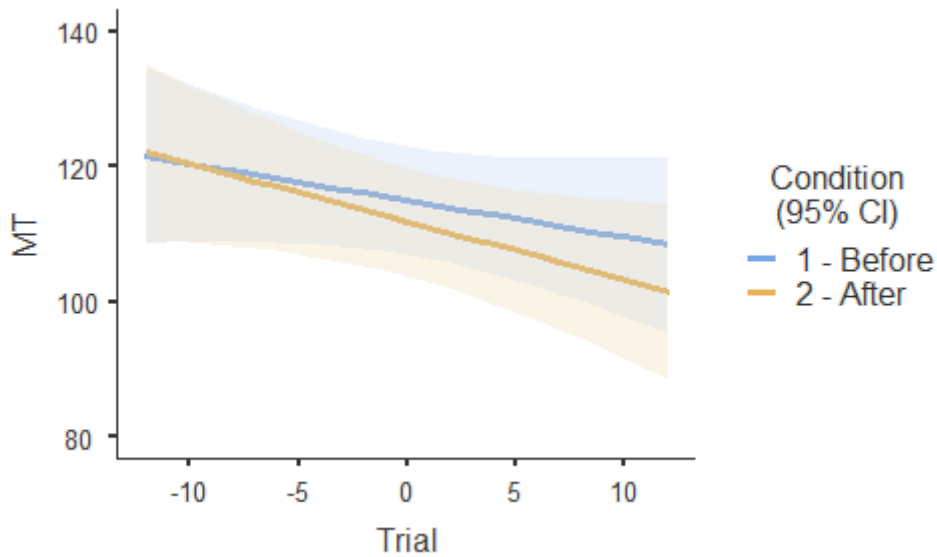

## Mixed Model

Model Info

| Info                  |                                                                       |
|-----------------------|-----------------------------------------------------------------------|
| Estimate              | Linear mixed model fit by REML                                        |
| Call                  | Residuals RT ~ 1 + Condition + Trial + FI + Condition: Trial+( 1 ID ) |
| AIC                   | 3000.430                                                              |
| R-squared Marginal    | 0.012                                                                 |
| R-squared Conditional | 0.141                                                                 |

## Model Results

Fixed Effect Omnibus tests

|                   | F      | Num df | Den df   | p      |
|-------------------|--------|--------|----------|--------|
| Condition         | 11.969 | 1      | 2101.870 | < .001 |
| Trial             | 0.724  | 1      | 2101.864 | 0.395  |
| FI                | 1.969  | 1      | 42.805   | 0.168  |
| Condition * Trial | 0.813  | 1      | 2101.867 | 0.367  |

Note. Satterthwaite method for degrees of freedom

Fixed Effects Parameter Estimates

| Names              | Effect                         | Estimate | SE    | 95% Confidence Interval |       | df       | t      | p      |
|--------------------|--------------------------------|----------|-------|-------------------------|-------|----------|--------|--------|
|                    |                                |          |       | Lower                   | Upper |          |        |        |
| (Intercept)        | (Intercept)                    | 0.477    | 0.031 | 0.416                   | 0.537 | 53.896   | 15.465 | < .001 |
| Condition1         | 2 - After - 1 - Before         | 0.070    | 0.020 | 0.031                   | 0.110 | 2101.870 | 3.460  | < .001 |
| Trial              | Trial                          | -0.003   | 0.002 | -0.007                  | 0.001 | 2101.835 | -1.240 | 0.215  |
| FI                 | FI                             | -0.005   | 0.003 | -0.011                  | 0.002 | 42.805   | -1.403 | 0.168  |
| Condition1 * Trial | 2 - After - 1 - Before * Trial | 0.003    | 0.003 | -0.003                  | 0.008 | 2101.867 | 0.902  | 0.367  |

Random Components

| Groups | Name        | SD    | Variance | ICC   |
|--------|-------------|-------|----------|-------|
| ID     | (Intercept) | 0.183 | 0.033    | 0.131 |
|        | Residual    | 0.472 | 0.222    |       |

Note. Numer of Obs: 2150 , groups: ID , 45

Post Hoc Tests

Post Hoc Comparisons - Condition

| Comparison |             | Difference | SE    | test   | df       | Pbonferroni |
|------------|-------------|------------|-------|--------|----------|-------------|
| Condition  | Condition   |            |       |        |          |             |
| 1 - Before | - 2 - After | -0.070     | 0.020 | -3.460 | 2102.067 | < .001      |

Estimated Marginal Means

Condition

| Condition  | Mean  | SE    | df     | 95% Confidence Interval |       |
|------------|-------|-------|--------|-------------------------|-------|
|            |       |       |        | Lower                   | Upper |
| 1 - Before | 0.477 | 0.031 | 53.896 | 0.415                   | 0.538 |
| 2 - After  | 0.547 | 0.031 | 53.896 | 0.485                   | 0.609 |

Note. Estimated means are estimated averaging across interacting variables

Trial

| Trial     | Mean  | SE    | df     | 95% Confidence Interval |       |
|-----------|-------|-------|--------|-------------------------|-------|
|           |       |       |        | Lower                   | Upper |
| Mean-1-SD | 0.520 | 0.031 | 53.901 | 0.459                   | 0.582 |
| Mean      | 0.512 | 0.029 | 42.804 | 0.453                   | 0.570 |
| Mean+1-SD | 0.503 | 0.031 | 53.902 | 0.441                   | 0.565 |

Note. Estimated means are estimated averaging across interacting variables

FI

| FI        | Mean  | SE    | df     | 95% Confidence Interval |       |
|-----------|-------|-------|--------|-------------------------|-------|
|           |       |       |        | Lower                   | Upper |
| Mean-1-SD | 0.553 | 0.041 | 42.808 | 0.470                   | 0.635 |
| Mean      | 0.512 | 0.029 | 42.804 | 0.453                   | 0.570 |
| Mean+1-SD | 0.471 | 0.041 | 42.801 | 0.388                   | 0.554 |

Note. Estimated means are estimated keeping constant other independent variable(s) in the model to the mean

Condition:Trial

| Condition  | Trial     | Mean  | SE    | df     | 95% Confidence Interval |       |
|------------|-----------|-------|-------|--------|-------------------------|-------|
|            |           |       |       |        | Lower                   | Upper |
| 1 - Before | Mean-1-SD | 0.494 | 0.034 | 79.777 | 0.427                   | 0.562 |
| 2 - After  | Mean-1-SD | 0.546 | 0.034 | 79.755 | 0.479                   | 0.614 |
| 1 - Before | Mean      | 0.477 | 0.031 | 53.896 | 0.415                   | 0.538 |
| 2 - After  | Mean      | 0.547 | 0.031 | 53.896 | 0.485                   | 0.609 |
| 1 - Before | Mean+1-SD | 0.459 | 0.034 | 79.629 | 0.391                   | 0.526 |
| 2 - After  | Mean+1-SD | 0.547 | 0.034 | 79.903 | 0.480                   | 0.615 |

Note. Estimated means are estimated keeping constant other independent variable(s) in the model to the mean

## Fixed Effects Plots



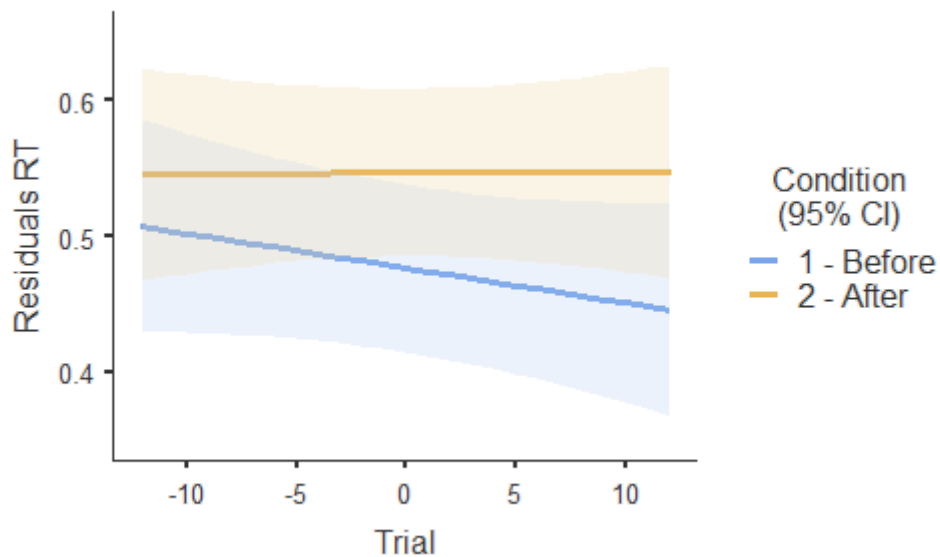

## Mixed Model

Model Info

| Info                  |                                                                       |
|-----------------------|-----------------------------------------------------------------------|
| Estimate              | Linear mixed model fit by REML                                        |
| Call                  | Residuals MT ~ 1 + Condition + Trial + FI + Condition: Trial+( 1 ID ) |
| AIC                   | 5643.318                                                              |
| R-squared Marginal    | 0.009                                                                 |
| R-squared Conditional | 0.050                                                                 |

## Model Results

Fixed Effect Omnibus tests

|                   | F     | Num df | Den df   | p     |
|-------------------|-------|--------|----------|-------|
| Condition         | 0.120 | 1      | 2102.028 | 0.729 |
| Trial             | 5.011 | 1      | 2102.013 | 0.025 |
| FI                | 4.858 | 1      | 42.852   | 0.033 |
| Condition * Trial | 1.709 | 1      | 2102.019 | 0.191 |

Note. Satterthwaite method for degrees of freedom

Fixed Effects Parameter Estimates

| Names              | Effect                         | Estimate | SE    | 95% Confidence Interval |       | df       | t      | p      |
|--------------------|--------------------------------|----------|-------|-------------------------|-------|----------|--------|--------|
|                    |                                |          |       | Lower                   | Upper |          |        |        |
| (Intercept)        | (Intercept)                    | 0.380    | 0.038 | 0.306                   | 0.455 | 75.817   | 9.983  | < .001 |
| Condition1         | 2 - After - 1 - Before         | -0.013   | 0.038 | -0.088                  | 0.061 | 2102.028 | -0.346 | 0.729  |
| Trial              | Trial                          | -0.003   | 0.004 | -0.010                  | 0.005 | 2101.933 | -0.659 | 0.510  |
| FI                 | FI                             | 0.008    | 0.004 | 9.395e-4                | 0.016 | 42.852   | 2.204  | 0.033  |
| Condition1 * Trial | 2 - After - 1 - Before * Trial | -0.007   | 0.005 | -0.018                  | 0.004 | 2102.019 | -1.307 | 0.191  |

Random Components

| Groups | Name        | SD    | Variance | ICC   |
|--------|-------------|-------|----------|-------|
| ID     | (Intercept) | 0.181 | 0.033    | 0.040 |
|        | Residual    | 0.882 | 0.778    |       |

Note. Numer of Obs: 2150 , groups: ID , 45

Post Hoc Tests

Post Hoc Comparisons - Condition

| Comparison |             | Difference | SE    | test  | df       | Pbonferroni |
|------------|-------------|------------|-------|-------|----------|-------------|
| Condition  | Condition   |            |       |       |          |             |
| 1 - Before | - 2 - After | 0.013      | 0.038 | 0.346 | 2102.180 | 0.729       |

Estimated Marginal Means

Condition

| Condition  | Mean  | SE    | df     | 95% Confidence Interval |       |
|------------|-------|-------|--------|-------------------------|-------|
|            |       |       |        | Lower                   | Upper |
| 1 - Before | 0.380 | 0.038 | 75.817 | 0.305                   | 0.456 |
| 2 - After  | 0.367 | 0.038 | 75.816 | 0.291                   | 0.443 |

Note. Estimated means are estimated averaging across interacting variables

Trial

| Trial     | Mean  | SE    | df     | 95% Confidence Interval |       |
|-----------|-------|-------|--------|-------------------------|-------|
|           |       |       |        | Lower                   | Upper |
| Mean-1-SD | 0.416 | 0.038 | 75.834 | 0.341                   | 0.492 |
| Mean      | 0.374 | 0.033 | 42.847 | 0.307                   | 0.441 |
| Mean+1-SD | 0.331 | 0.038 | 75.834 | 0.255                   | 0.407 |

Note. Estimated means are estimated averaging across interacting variables

FI

| FI        | Mean  | SE    | df     | 95% Confidence Interval |       |
|-----------|-------|-------|--------|-------------------------|-------|
|           |       |       |        | Lower                   | Upper |
| Mean-1-SD | 0.301 | 0.047 | 42.858 | 0.207                   | 0.395 |
| Mean      | 0.374 | 0.033 | 42.847 | 0.307                   | 0.441 |
| Mean+1-SD | 0.447 | 0.047 | 42.841 | 0.352                   | 0.541 |

Note. Estimated means are estimated keeping constant other independent variable(s) in the model to the mean

Condition:Trial

| Condition  | Trial     | Mean  | SE    | df      | 95% Confidence Interval |       |
|------------|-----------|-------|-------|---------|-------------------------|-------|
|            |           |       |       |         | Lower                   | Upper |
| 1 - Before | Mean-1-SD | 0.398 | 0.047 | 167.269 | 0.306                   | 0.490 |
| 2 - After  | Mean-1-SD | 0.435 | 0.047 | 167.190 | 0.343                   | 0.527 |
| 1 - Before | Mean      | 0.380 | 0.038 | 75.817  | 0.305                   | 0.456 |
| 2 - After  | Mean      | 0.367 | 0.038 | 75.816  | 0.291                   | 0.443 |
| 1 - Before | Mean+1-SD | 0.363 | 0.047 | 166.722 | 0.271                   | 0.455 |
| 2 - After  | Mean+1-SD | 0.300 | 0.047 | 167.738 | 0.208                   | 0.392 |

Note. Estimated means are estimated keeping constant other independent variable(s) in the model to the mean

## Fixed Effects Plots

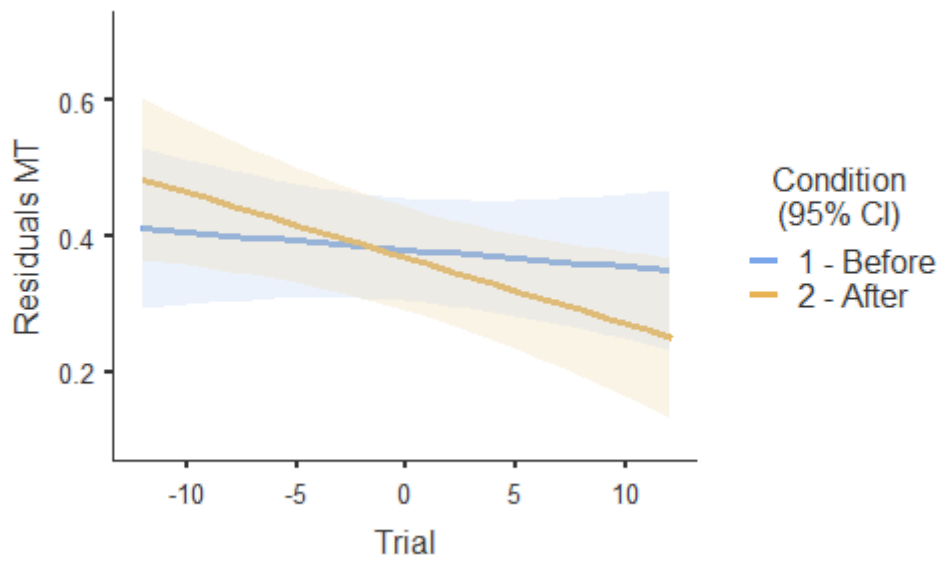

## References

- [1] The jamovi project (2019). *jamovi*. (Version 0.9) [Computer Software]. Retrieved from <https://www.jamovi.org>.
- [2] R Core Team (2018). *R: A Language and environment for statistical computing*. [Computer software]. Retrieved from <https://cran.r-project.org/>.
